# Supplementary material for: Absorption and Safety With Sustained Use of RELiZORB Evaluation (ASSURE) Study in Patients With Cystic Fibrosis Receiving Enteral Feeding
Source: PubMed Central journal article supplement (PMC6155360; doi:10.1097/mpg.0000000000002110), 2018-08-01
Supplement: jpga-67-527-s001.pdf [file jpga-67-527-s001.pdf]

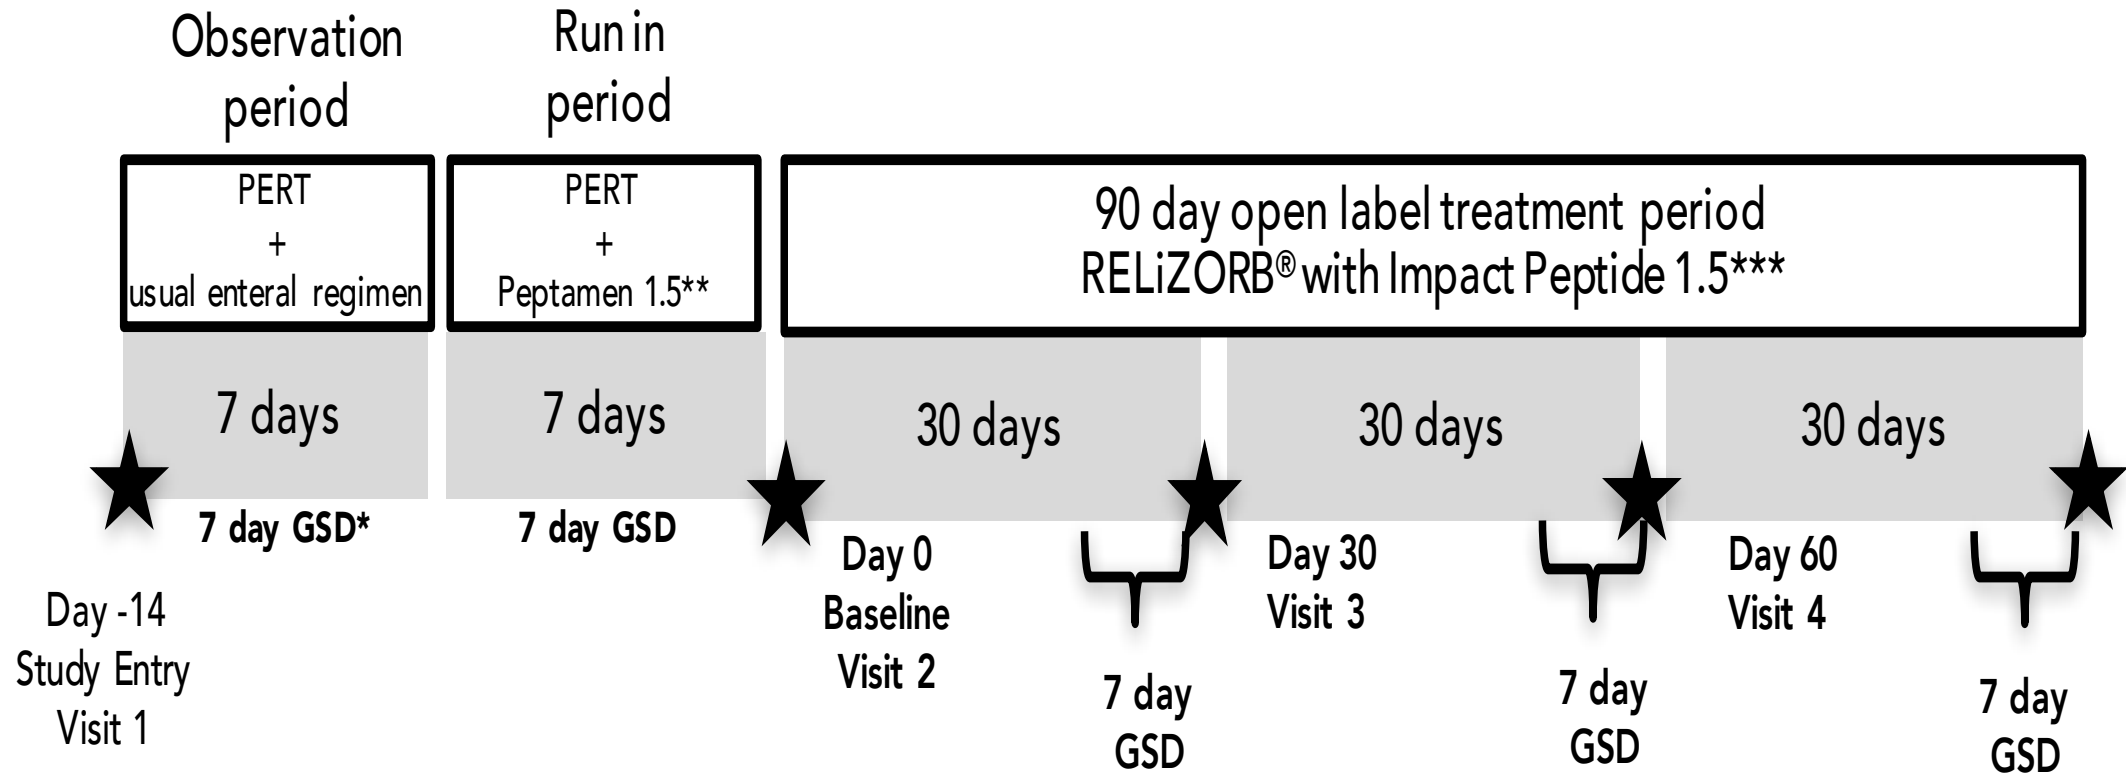

**Supplemental Digital Content 1 : ASSURE Study Diagram**

GSD - Gastrointestinal Symptom Diary; PERT - Pancreatic Enzyme Replacement Therapy
