# Supplementary material for: Absorption and Safety With Sustained Use of RELiZORB Evaluation (ASSURE) Study in Patients With Cystic Fibrosis Receiving Enteral Feeding
Source: PubMed Central journal article supplement (PMC6155360; doi:10.1097/mpg.0000000000002110), 2018-08-01
Supplement: jpga-67-527-s002.pdf [file jpga-67-527-s002.pdf]

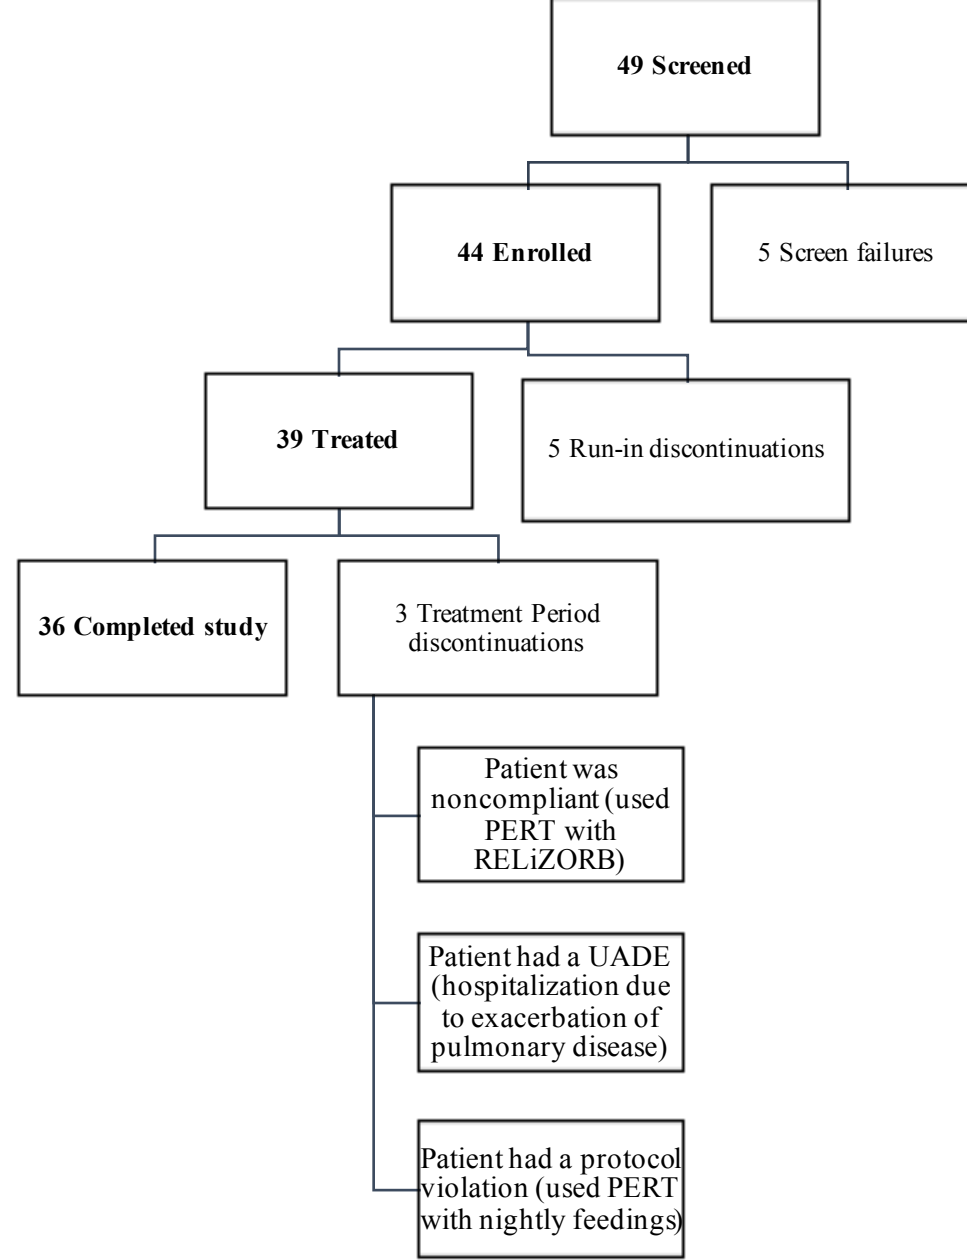

**Supplemental Digital Content 2 : ASSURE CONSORT Flow Diagram**
